# Supplementary material for: Anticonvulsant and Toxicological Evaluation of Parafluorinated/Chlorinated Derivatives of 3-Hydroxy-3-ethyl-3-phenylpropionamide
Source: Hindawi journal article supplement (doi:10.1155/2016/3978010), 2016-01-01
Supplement: f1 [file 3978010.f1.pdf]

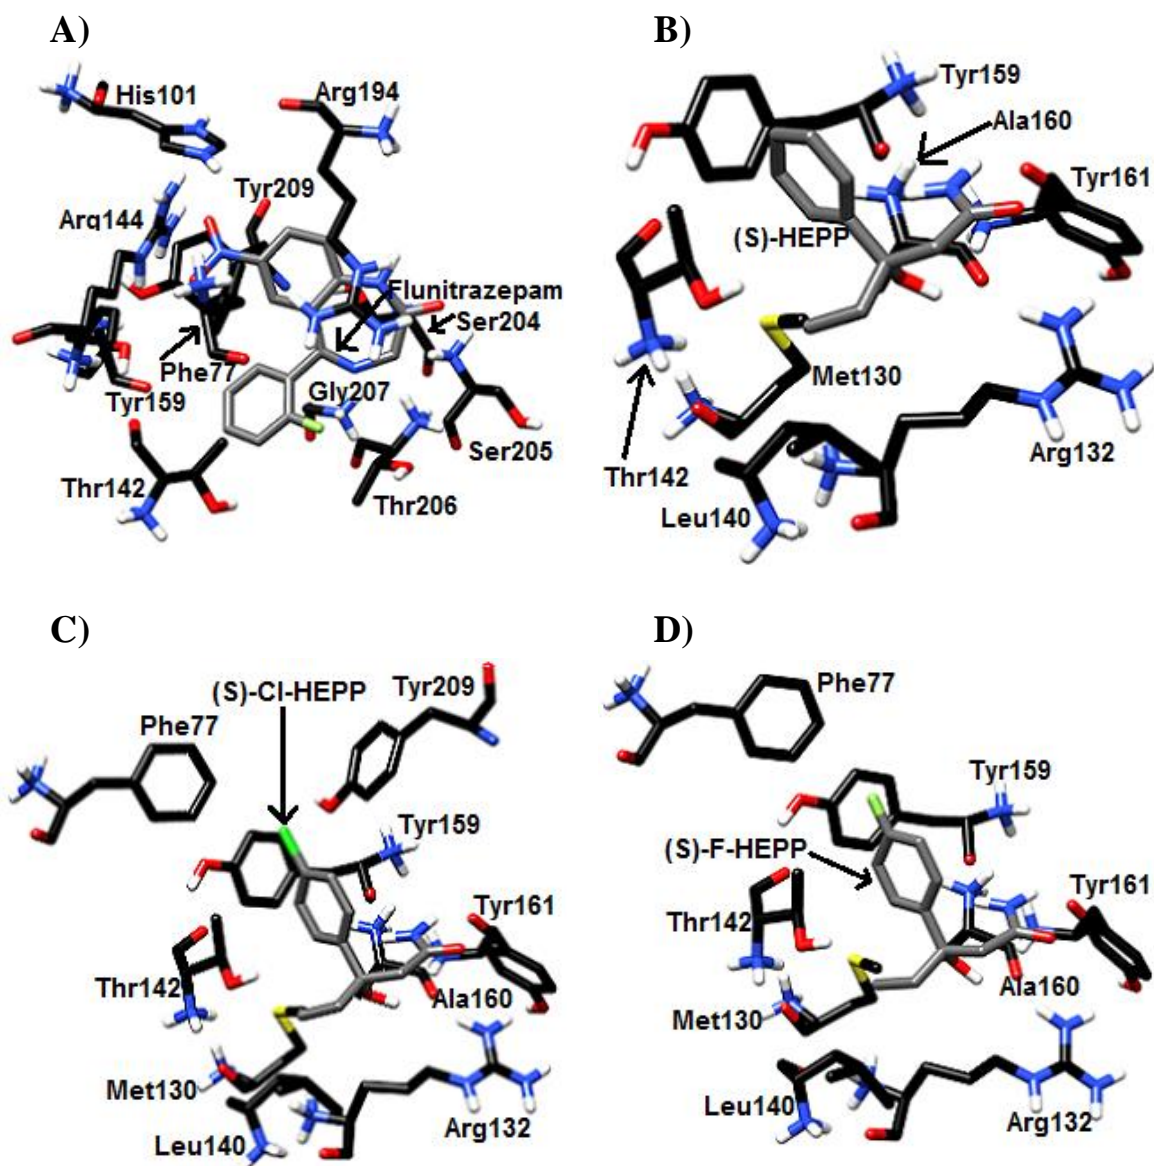

**Supplementary Figure 1:** Binding of flunitrazepam, (S)-HEPP, (S)-Cl-HEPP, and (S)-F-HEPP on the benzodiazepine binding site of GABA<sub>A</sub> receptor.

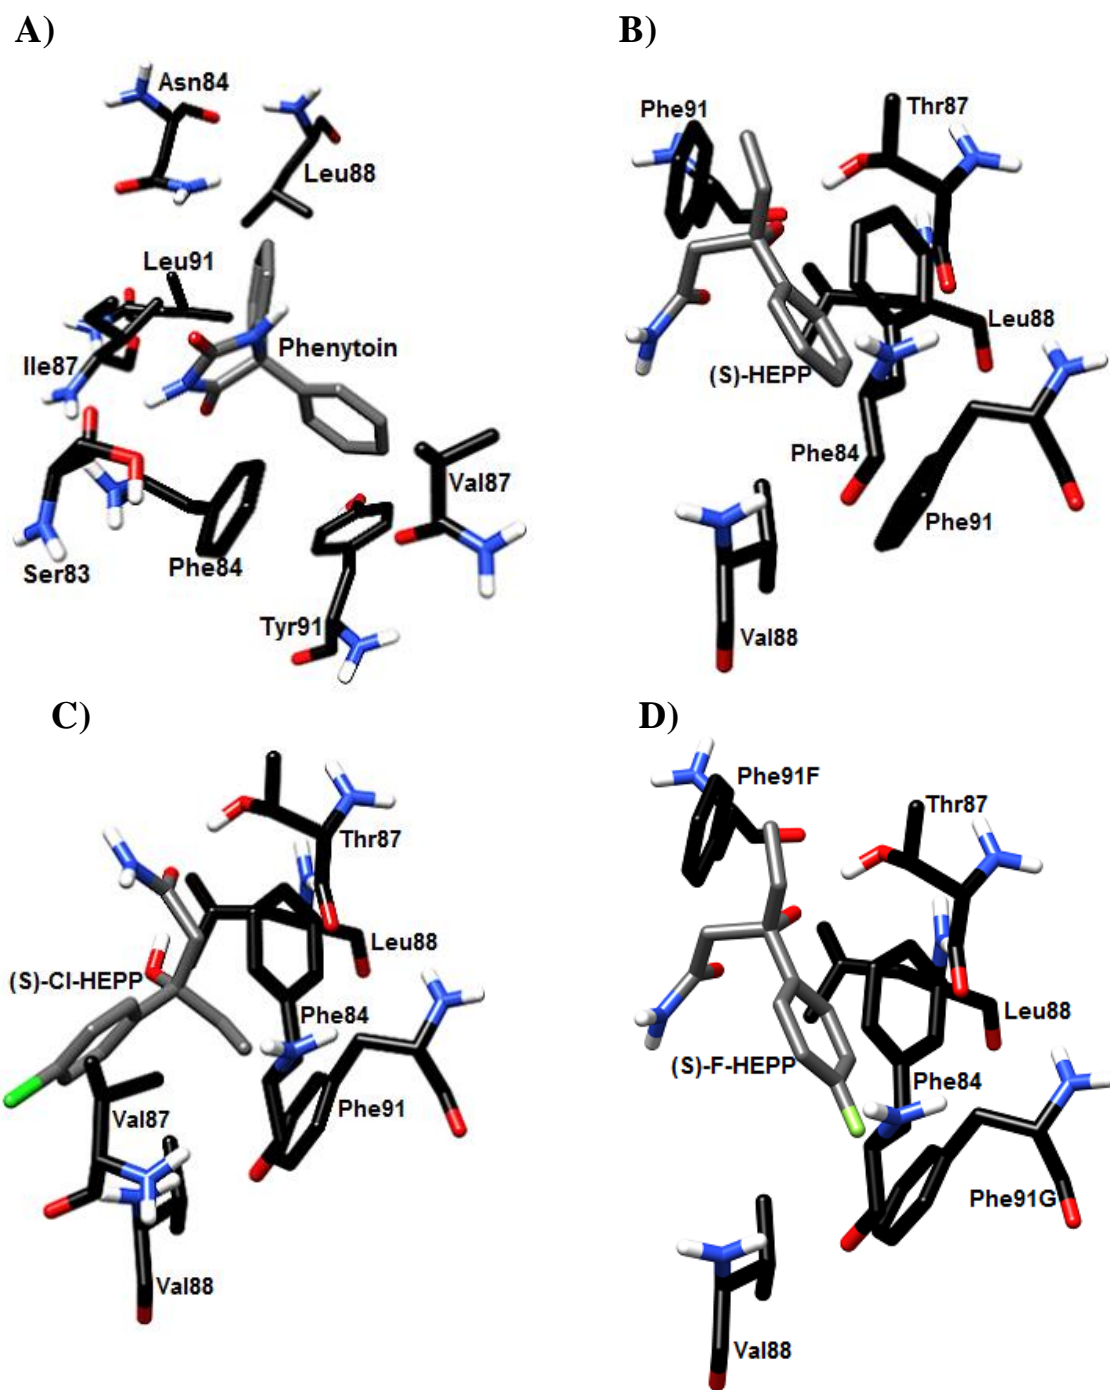

Supplementary Figure 2: Docking of phenytoin, HEPP and tested ligands on sodium channel Nav1.2.

**Supplementary Table 1.** Amino acids reached by the tested compounds to produce the interaction described in Figures 4 and Supplementary Fig. 1, and the binding free energies of HEPP, F-HEPP, and Cl-HEPP in docking studies on GABA<sub>A</sub> receptor.

| Compound                   | Flunitrazepam | (R)-HEPP | (R)-Cl-HEPP | (R)-F-HEPP | (S)-HEPP | (S)-Cl-HEPP | (S)-F-HEPP |
|----------------------------|---------------|----------|-------------|------------|----------|-------------|------------|
| $\Delta G$                 | -7.42         | -5.28    | -5.81       | -5.3       | -5.52    | -6.08       | -5.59      |
| Amino acids of interaction | Phe77         |          | Phe77       | Phe77      |          | Phe77       | Phe77      |
|                            | His101        |          |             |            |          |             |            |
|                            |               | Met130   | Met130      | Met130     | Met130   | Met130      | Met130     |
|                            |               | Arg132   | Arg132      | Arg132     | Arg132   | Arg132      | Arg132     |
|                            |               | Leu140   | Leu140      | Leu140     | Leu140   | Leu140      | Leu140     |
|                            | Thr142        | Thr142   | Thr142      | Thr142     | Thr142   | Thr142      | Thr142     |
|                            | Arg144        |          |             |            |          |             |            |
|                            | Tyr159        | Tyr159   | Tyr159      | Tyr159     | Tyr159   | Tyr159      | Tyr159     |
|                            |               | Ala160   | Ala160      | Ala160     | Ala160   | Ala160      | Ala160     |
|                            |               |          |             | Tyr161     | Tyr161   | Tyr161      | Tyr161     |
|                            | Arg194        |          |             |            |          |             |            |
|                            | Ser204        |          |             |            |          |             |            |
|                            | Ser205        |          |             |            |          |             |            |
|                            | Thr206        |          |             |            |          |             |            |
|                            | Gly207        |          | Gly207      |            |          |             |            |
|                            | Tyr209        |          | Tyr209      |            |          | Tyr209      |            |

(R)-HEPP: (R)-3-hydroxy, 3-ethyl, 3-phenylpropionamide,); (R)-Cl-HEPP: (3R)-3-hydroxy, 3-ethyl, 3-(4'-chlorophenyl) propionamide; (3R)-F-HEPP: (3R)-3-hydroxy, 3-ethyl, 3-(4'-fluorophenyl)propionamide; (S)-HEPP: (3S)-3-hydroxy, 3-ethyl, 3-phenylpropionamide; (S)-Cl-HEPP: (3S)-3-hydroxy, 3-ethyl, 3-(4'-chlorophenyl) propionamide; (3S)-F-HEPP: (3S)-3-hydroxy, 3-ethyl, 3-(4'-fluorophenyl)propionamide.

**Supplementary Table 2:** The amino acids reached by the tested compounds to produce the interaction described in Figures 5 and Supplementary Figure 2, and the binding free energies of HEPP, F-HEPP, and Cl-HEPP in docking studies on sodium channel Nav1.2.

| Compound                   | Phenytoin | (R)-HEPP | (R)-Cl-HEPP | (R)-F-HEPP | (S)-HEPP | (S)-Cl-HEPP | (S)-F-HEPP |
|----------------------------|-----------|----------|-------------|------------|----------|-------------|------------|
| $\Delta G$                 | -6.01     | -4.47    | -4.6        | -4.37      | -4.43    | -4.47       | -4.42      |
| Amino acids of interaction | Chain E   | Chain E  | Chain E     | Chain E    | Chain E  | Chain E     | Chain E    |
|                            | Ser83*    |          |             |            |          |             |            |
|                            | Phe84*    | Phe84    |             |            |          |             |            |
|                            | Ile87     | Ile87    |             |            |          |             |            |
|                            |           | Asn88    |             |            |          |             |            |
|                            | Leu91     | Leu91    |             |            |          |             |            |
|                            | Chain F   | Chain F  | Chain F     | Chain F    | Chain F  | Chain F     | Chain F    |
|                            | Asn84     |          |             |            |          |             |            |
|                            | Leu88*    |          |             |            |          |             |            |
|                            |           |          |             | Phe91      | Phe91    |             | Phe91      |
|                            | Chain G   | Chain G  | Chain G     | Chain G    | Chain G  | Chain G     | Chain G    |
|                            |           |          | Thr87       | Thr87      | Thr87    | Thr87       | Thr87      |
|                            |           |          | Leu88       | Leu88      | Leu88    | Leu88       | Leu88      |
|                            |           |          | Phe91       | Phe91      | Phe91    | Phe91       | Phe91      |
|                            | Chain H   | Chain H  | Chain H     | Chain H    | Chain H  | Chain H     | Chain H    |
|                            |           |          | Phe84       | Phe84      | Phe84    | Phe84       | Phe84      |
|                            | Val87*    | Val87    | Val87       |            |          | Val87       |            |
|                            |           | Val88    | Val88       | Val88      | Val88    | Val88       | Val88      |
|                            | Tyr91     |          |             |            |          |             |            |

(R)-HEPP: (R)-3-hydroxy, 3-ethyl, 3-phenylpropionamide,); (R)-Cl-HEPP: (3R)-3-hydroxy, 3-ethyl, 3-(4'-chlorophenyl) propionamide; (3R)-F-HEPP: (3R)-3-hydroxy, 3-ethyl, 3-(4'-fluorophenyl)propionamide; (S)-HEPP: (3S)-3-hydroxy, 3-ethyl, 3-phenylpropionamide; (S)-Cl-HEPP: (3S)-3-hydroxy, 3-ethyl, 3-(4'-chlorophenyl) propionamide; (3S)-F-HEPP: (3S)-3-hydroxy, 3-ethyl, 3-(4'-fluorophenyl)propionamide.

\*Amino acids relevant in the phenytoin binding [36].
